# Supplementary material
Source: HighWire-hosted journal article supplement (https://www.cmaj.ca/highwire/filestream/59655/field_highwire_adjunct_files/1/151201-res-2-at.pdf)
Supplement: 151201-res-2-at.pdf [file 151201-res-2-at.pdf]

**Appendix 2 (as supplied by the authors):** Overall impact of the NHS Health Check on modelled CVD risk and CVD risk factors (when patients were additionally matched for baseline systolic BP, cholesterol, BMI and smoking status) (N=138,788)

| Outcome and group              | n       | Crude DID (95%CI)           | DID matching estimator in main analysis (95%CI) | *Extensive DID matching estimator (95%CI) |
|--------------------------------|---------|-----------------------------|-------------------------------------------------|-------------------------------------------|
| <b>QRISK2 (10-year % risk)</b> |         |                             |                                                 |                                           |
| Attendees                      | 29,672  | <b>-0.29 (-0.31, -0.27)</b> | <b>-0.21 (-0.24, -0.19)</b>                     | <b>-0.14 (-0.16, -0.11)</b>               |
| Non-attendees                  | 109,116 |                             |                                                 |                                           |
| <b>Systolic BP (mmHg)</b>      |         |                             |                                                 |                                           |
| Attendees                      | 29,672  | <b>-2.72 (-2.88, -2.56)</b> | <b>-2.51 (-2.77, -2.25)</b>                     | <b>-1.60 (-1.86, -1.34)</b>               |
| Non-attendees                  | 109,116 |                             |                                                 |                                           |
| <b>Diastolic BP (mmHg)</b>     |         |                             |                                                 |                                           |
| Attendees                      | 29,672  | <b>-1.74 (-1.84, -1.64)</b> | <b>-1.46 (-1.62, -1.29)</b>                     | <b>-1.05 (-1.22, -0.88)</b>               |
| Non-attendees                  | 109,116 |                             |                                                 |                                           |
| <b>BMI (kg/m<sup>2</sup>)</b>  |         |                             |                                                 |                                           |
| Attendees                      | 29,672  | <b>-0.28 (-0.30, -0.27)</b> | <b>-0.27 (-0.34, -0.20)</b>                     | <b>-0.21 (-0.27, -0.15)</b>               |
| Non-attendees                  | 109,116 |                             |                                                 |                                           |
| <b>TChol (mmol/L)</b>          |         |                             |                                                 |                                           |
| Attendees                      | 29,672  | <b>-0.20 (-0.20, -0.19)</b> | <b>-0.15 (-0.18, -0.13)</b>                     | <b>-0.10 (-0.12, -0.07)</b>               |
| Non-attendees                  | 109,116 |                             |                                                 |                                           |
| <b>Smoking prevalence (%)</b>  |         |                             |                                                 |                                           |
| Attendees                      | 29,672  | <b>-0.22 (-0.46, 0.01)</b>  | <b>-0.11 (-0.35, 0.13)</b>                      | <b>-0.54 (-0.78, -0.30)</b>               |
| Non-attendees                  | 109,116 |                             |                                                 |                                           |
| <b>Statin prescribing (%)</b>  |         |                             |                                                 |                                           |
| Attendees                      | 29,672  | <b>4.40 (4.17, 4.62)</b>    | <b>3.83 (3.52, 4.14)</b>                        | <b>3.72 (3.41, 4.03)</b>                  |
| Non-attendees                  | 109,116 |                             |                                                 |                                           |
| <b>Antihyp prescribing (%)</b> |         |                             |                                                 |                                           |
| Attendees                      | 29,672  | <b>2.45 (2.20, 2.71)</b>    | <b>1.37 (1.08, 1.66)</b>                        | <b>1.02 (0.73, 1.31)</b>                  |
| Non-attendees                  | 109,116 |                             |                                                 |                                           |

Note: DID=difference-in-differences; Crude DID=difference in differences without matching; CI=confidence interval ; BP=blood pressure; BMI=body mass index; TChol=total cholesterol.

\*The extensive DID matching model further included systolic BP, BMI, TChol and smoking status in the matching process.
